# Supplementary material
Source: publisher site journal article supplement (https://nl.pensoft.net/article/5218/download/suppl/36/)
Supplement: Supplementary file 1

Alternative suboptimal models fitted to the species means (models 3 to 7) and the independent contrasts (models 8 and 9). Regression details as in the main text. The purpose of these equations is allowing the estimation of dry body weights under realistic circumstances such as the absence of the abdomen, or of part of it (e.g. due to the dissection of the genitalia for identification). --- = variable excluded ( $P>0.05$ ); \* =  $P<0.05$ , \*\* =  $P<0.01$ , \*\*\* =  $P<0.001$ .

| Model            | Model 3    | Model 4    | Model 5    | Model 6    | Model 7    | Model 8    | Model 9    |
|------------------|------------|------------|------------|------------|------------|------------|------------|
| Intercept        | -0.399 *** | -0.638 *** | -0.633 *** | -0.436 *** | -0.425 *** | -0.609 *** | -0.789 *** |
| FWL              | ---        | 0.437 ***  | 0.549 ***  | ---        | ---        | 0.559 ***  | 0.655 ***  |
| FWL <sup>2</sup> | 0.110 **   | ---        | ---        | 0.188 ***  | ---        | ---        | ---        |
| FWW              | 0.163 *    | ---        | ---        | ---        | ---        | ---        | ---        |
| TL               | 1.157 ***  | 1.268 ***  | 1.285 ***  | 1.389 ***  | 1.636 ***  | 1.233 ***  | 1.268 ***  |
| TW               | 0.606 ***  | 0.547 ***  | 0.624 ***  | 1.070 ***  | 0.378 **   | 0.595 *    | 0.922 ***  |
| AL               | 0.265 **   | 0.226 *    | ---        | ---        | 0.427 ***  | ---        | ---        |
| AW               | 0.386 ***  | 0.393 ***  | 0.411 ***  | ---        | 0.386 ***  | 0.445 *    | ---        |
|                  |            |            |            |            |            |            |            |
| Model R          | 0.9822 *** | 0.9820 *** | 0.9816 *** | 0.9809 *** | 0.9811 *** | 0.9092 *** | 0.9056 *** |
